# Supplementary material for: Two component gels of immiscible blends of biscarbamates (polyurethane model compounds) and poly(ε-caprolactone)
Source: Royal Society of Chemistry journal article supplement (doi:10.1039/c2sm26311d), 2012-01-01
Supplement: c2sm26311d.pdf [file c2sm26311d.pdf]

# **Two Component Gels of Immiscible Blends of Biscarbamates (Polyurethane Model Compounds) and Poly ( $\epsilon$ -Caprolactone)**

Mostofa Kamal Khan, Anita Chan and Pudupadi R. Sundararajan\*

Department of Chemistry, Carleton University  
1125 Colonel By Drive, Ottawa, Ontario K1S 5B6  
Canada

Supplementary Information

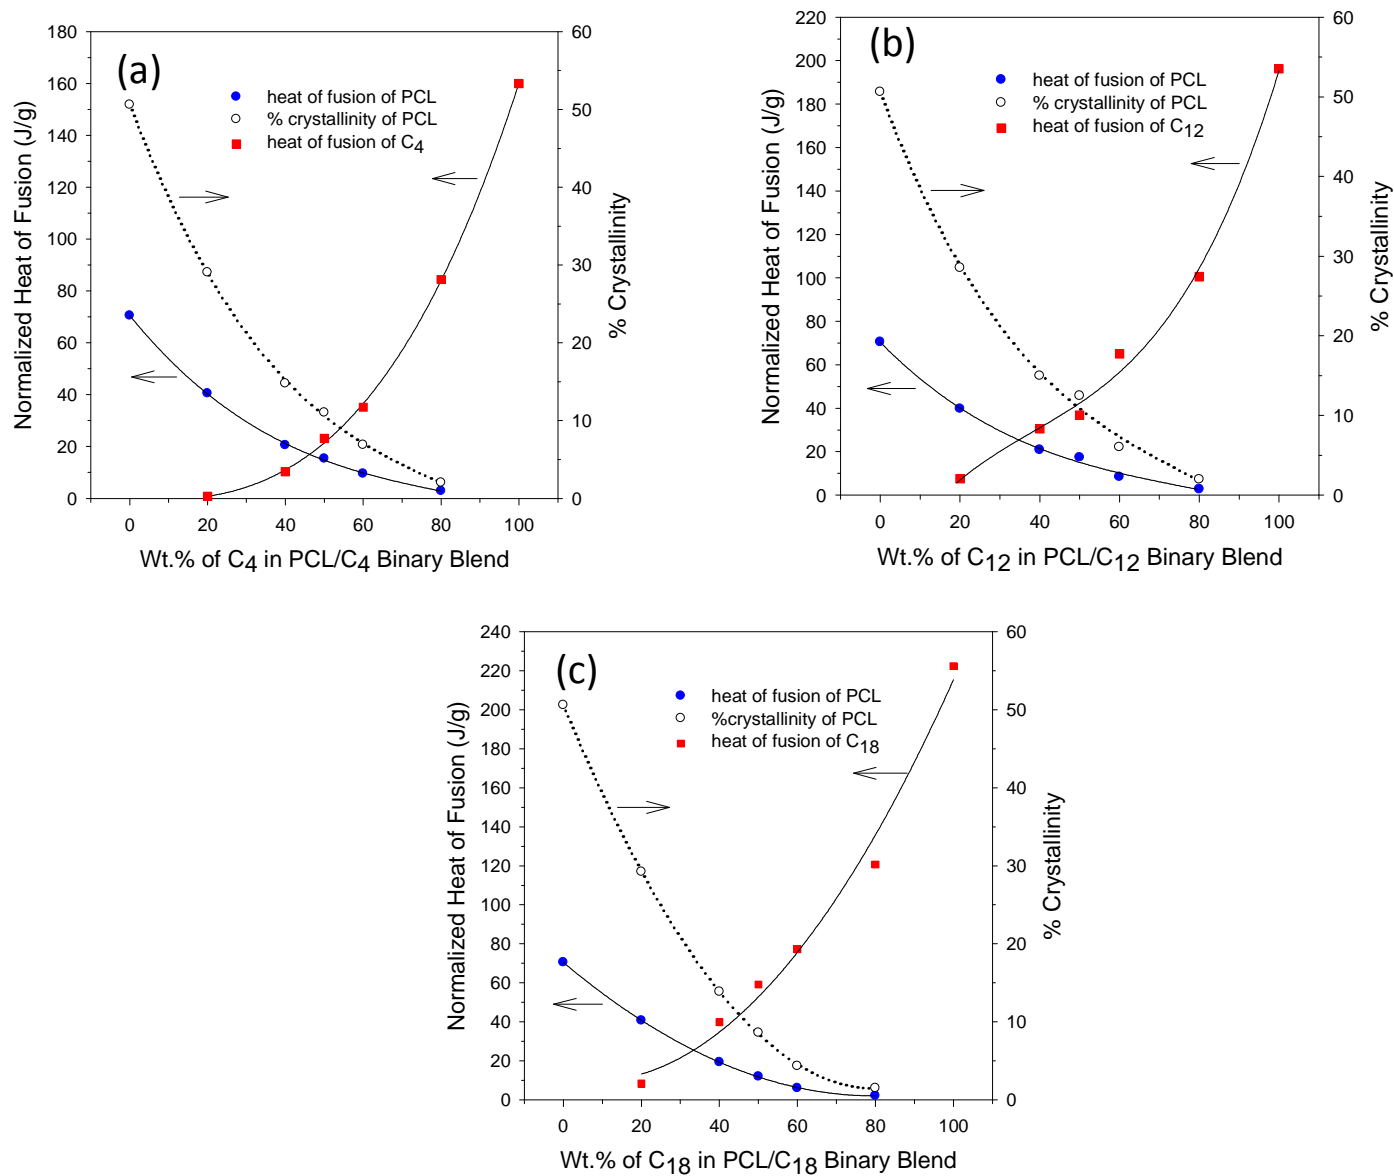

Fig. S1. Normalized heats of fusion of PCL/biscarbamate binary blends: (a) PCL/C<sub>4</sub>, (b) PCL/C<sub>12</sub>, and (c) PCL/C<sub>18</sub>. The variation of crystallinity of PCL with the concentration of the biscarbamate is also shown (....).

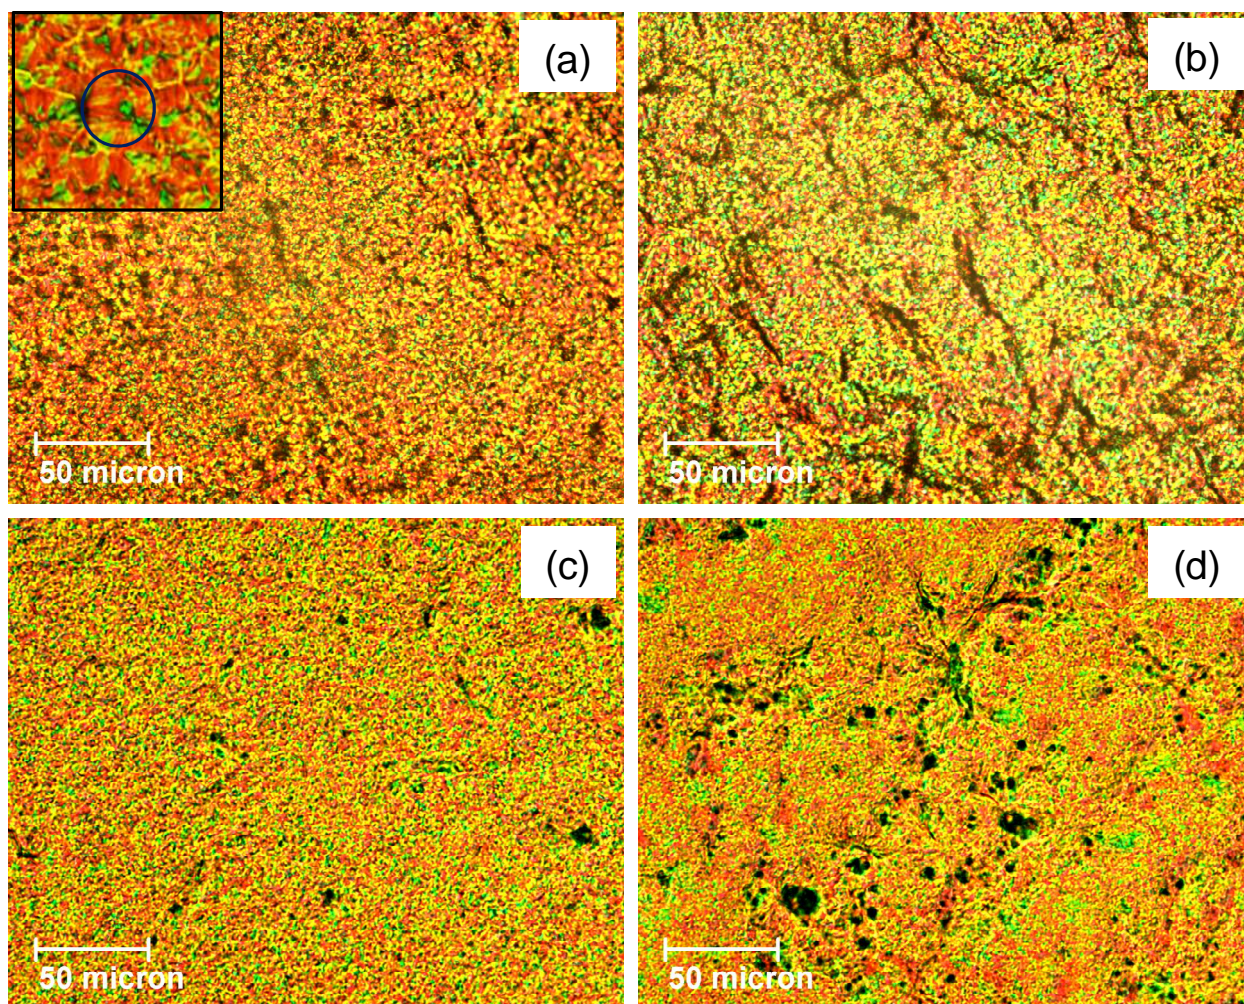

Figure S2 Optical micrographs of blend films cast from chloroform solutions. (a, b): PCL/ C<sub>12</sub> biscarbamate: 99/1 and 98/2 (wt%), respectively; (c, d): PCL/ C<sub>18</sub> biscarbamate: 99/1 and 98/2 (wt%), respectively. The inset in (a) shows an enlarged OM view of a spherulite.



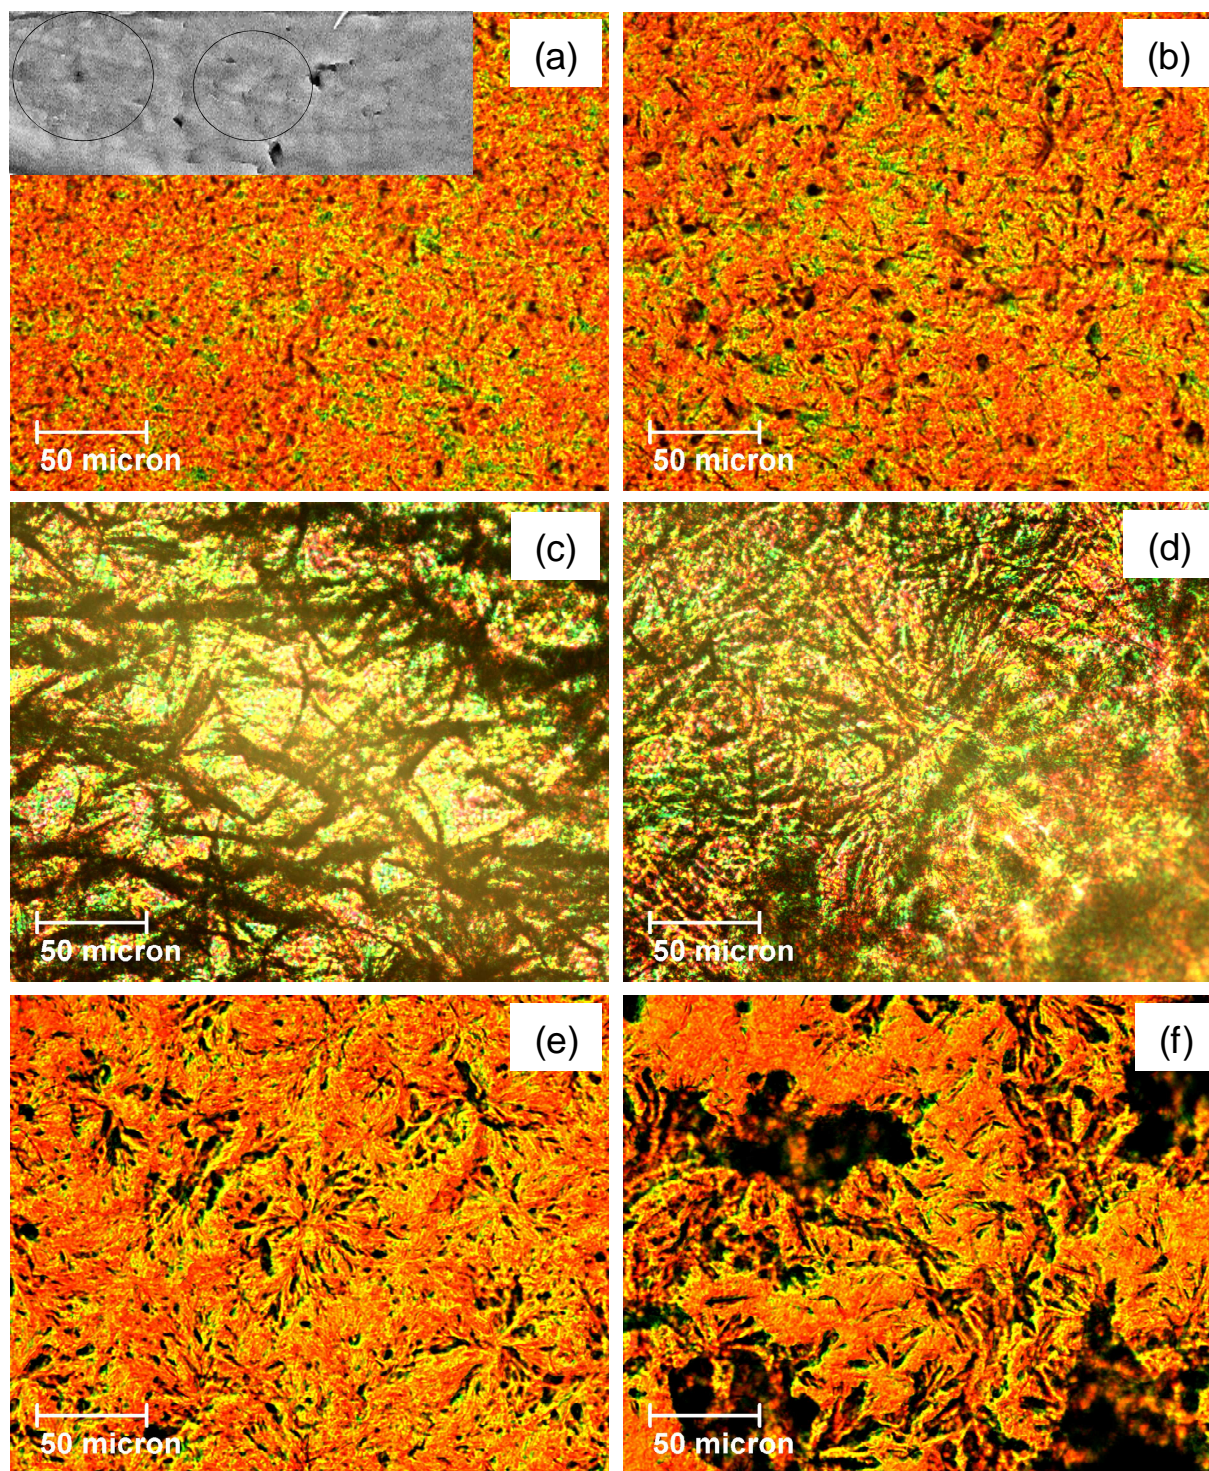

Fig. S3. Optical micrographs of PCL/biscarbamate blend films cast from chloroform solutions with 5% (wt) (left column) and 10% (right column) of biscarbamate. (a, b): C<sub>4</sub> biscarbamate; (c, d): C<sub>12</sub> biscarbamate, and (e, f): C<sub>18</sub> biscarbamate. The inset in (a) shows a SEM image of the spherulites.



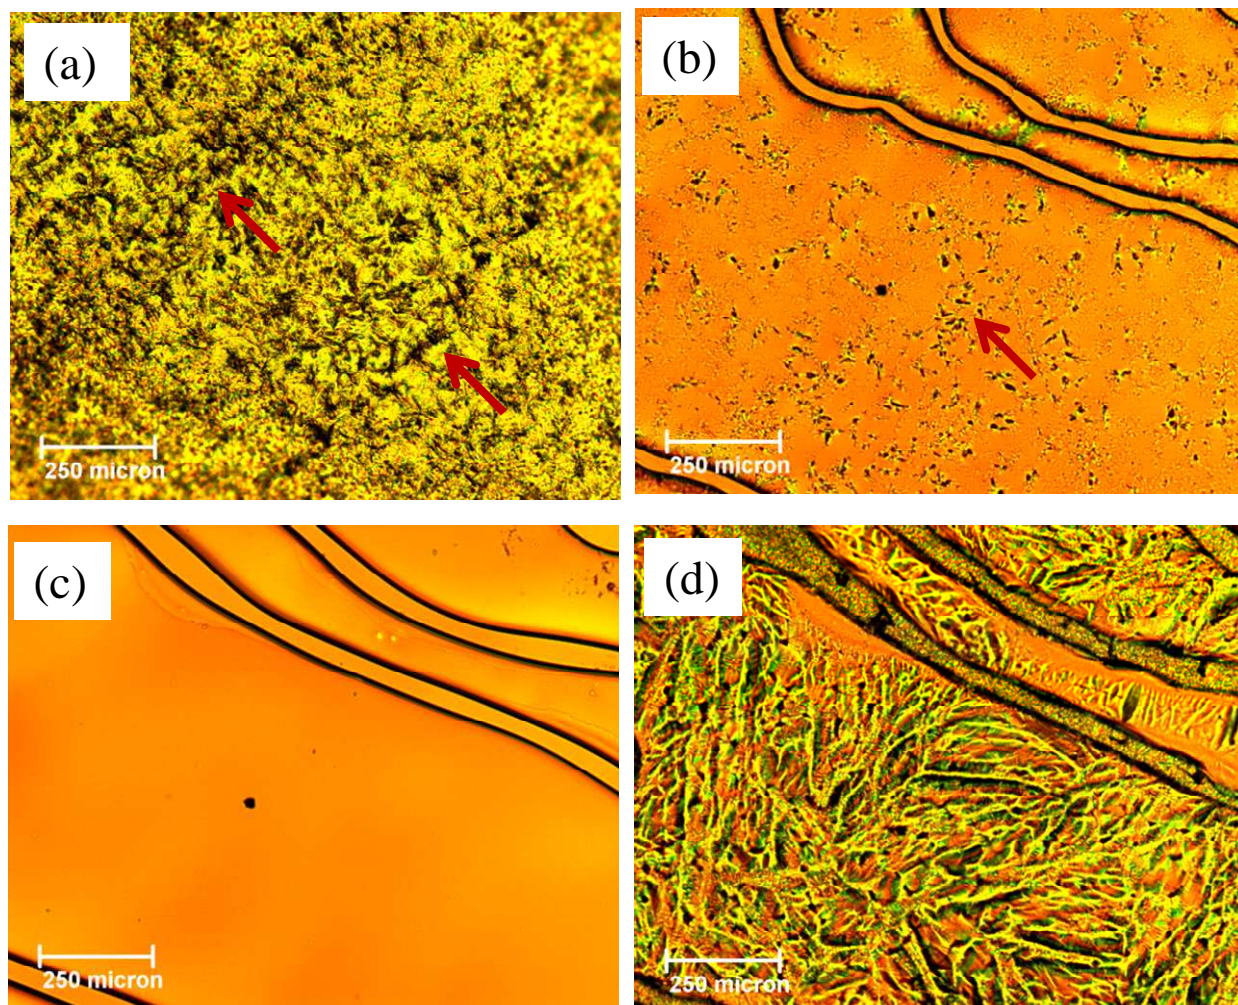

Fig. S4. Optical micrographs of PCL/5%C<sub>18</sub> biscalbamate films at different temperatures: (a) At 25 °C, aggregates of C<sub>18</sub> crystals are seen in the PCL matrix. The arrows point to the crystalline aggregates of C<sub>18</sub>. (b) At 110 °C PCL had melted, and channels arise (seen from top left to right) due to the phase separated, molten polymer. (c) At 125 °C, C<sub>18</sub> has also melted. Upon cooling to 104 and 70 °C, C<sub>18</sub> crystallized as radiating lamellae (not shown). and (d) Upon further cooling to 25 °C PCL crystallized along the channels and also as aggregate crystals between the lamellae of C<sub>18</sub>. The channels running from top left to right in (b) – (d) are the trenches separating the domains created upon melting of the polymer at elevated temperatures.

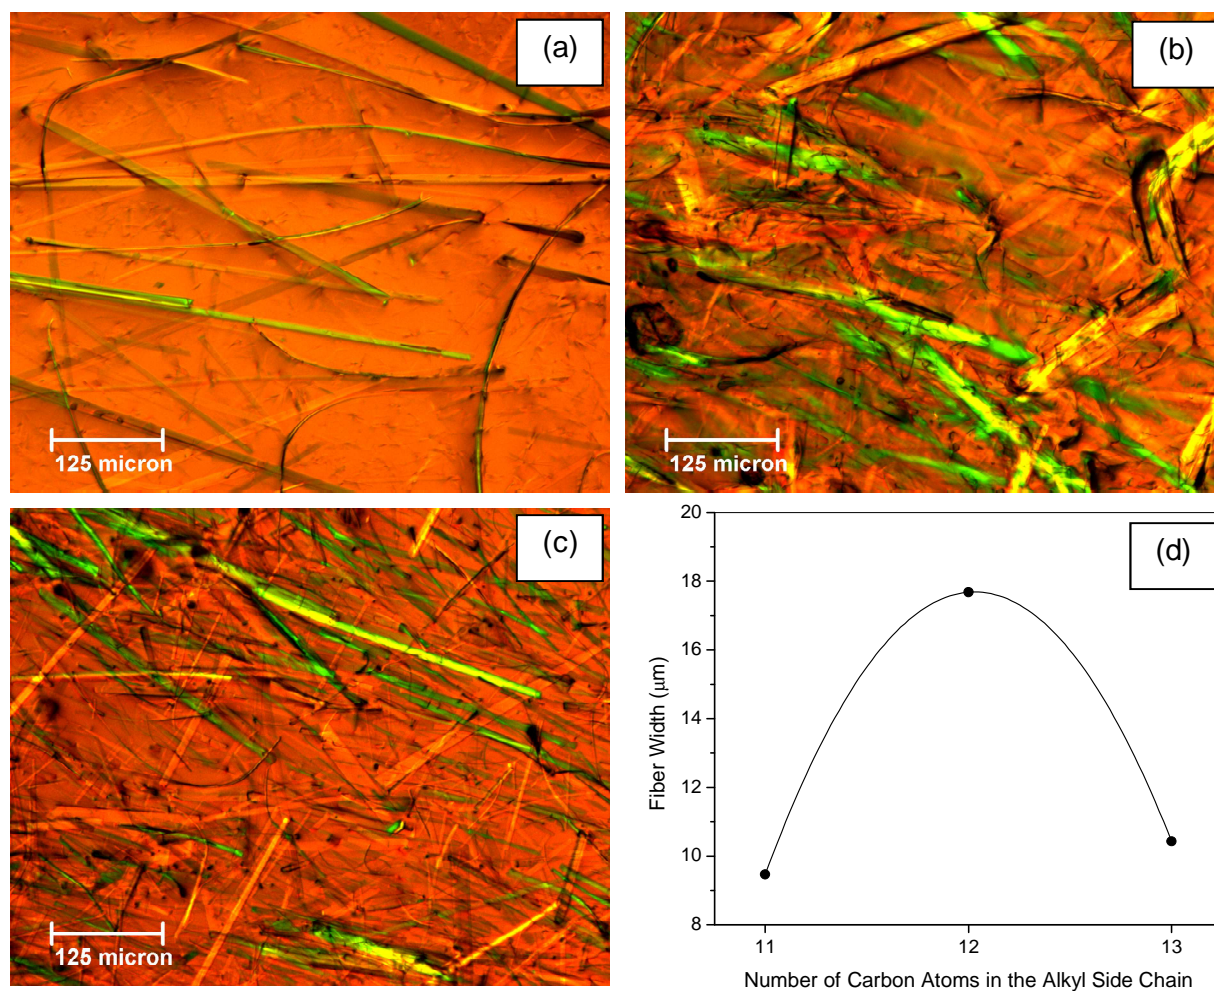

Fig. S5. Optical micrographs showing the change in the fiber width as a function of alkyl side chain length at a constant (15 wt%) composition: (a)  $C_{11}$ , (b)  $C_{12}$ , and (c)  $C_{13}$ . A graph of the variation is shown in (d).
